# Supplementary material for: Short-Term Exposure to Benzo(a)Pyrene Causes Disruption of GnRH Network in Zebrafish Embryos
Source: MDPI journal article supplement (doi:10.3390/ijms24086913), 2023-04-07
Supplement: s1 [file s1]

# Short-Term Exposure to Benzo(a)Pyrene Causes Disruption of GnRH Network in Zebrafish Embryos

Ilaria Gentile <sup>1</sup>, Valeria Vezzoli <sup>2</sup>, Sara Martone <sup>3</sup>, Maria Grazia Totaro <sup>3</sup>, Marco Bonomi <sup>1,2</sup>, Luca Persani <sup>1,2,\*</sup> and Federica Marelli <sup>2</sup>

<sup>1</sup> Department of Medical Biotechnology and Translational Medicine, University of Milan, 20133 Milan, Italy; [ilaria.gentile@unimi.it](mailto:ilaria.gentile@unimi.it) (I.G.); [m.bonomi@auxologico.it](mailto:m.bonomi@auxologico.it) (M.B.)

<sup>2</sup> Division of Endocrine and Metabolic Diseases, Laboratory of Endocrine and Metabolic Research, IRCCS Istituto Auxologico Italiano, 20149 Milan, Italy; [v.vezzoli@auxologico.it](mailto:v.vezzoli@auxologico.it) (V.V.); [federica.marelli.fm@gmail.com](mailto:federica.marelli.fm@gmail.com) (F.M.)

<sup>3</sup> IFOM-FIRC, Institute of Molecular Oncology, 20139 Milan, Italy; [sara.martone@ifom.eu](mailto:sara.martone@ifom.eu) (S.M.); [mariagrazia.totaro@ifom.eu](mailto:mariagrazia.totaro@ifom.eu) (M.G.T.)

\* Correspondence: [luca.persani@unimi.it](mailto:luca.persani@unimi.it); Tel.: +39-02619112432

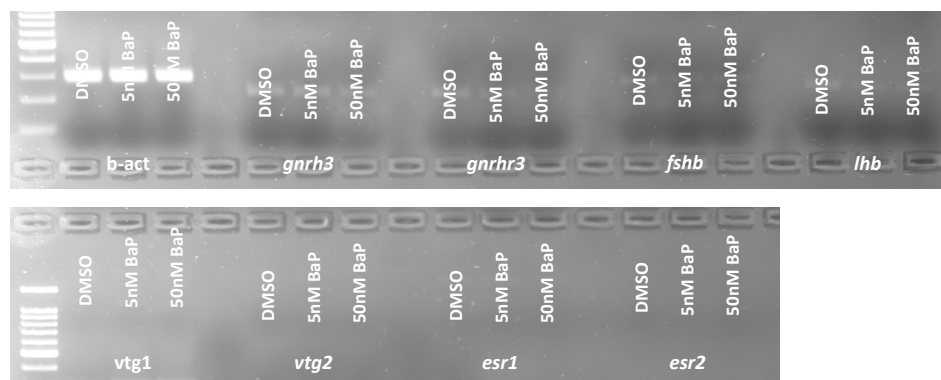

**Supplementary Figure S1:** Electrophoresis of qPCR products of *b-actin*, *gnhr3*, *gnhr3*, *fshb*, *lhb*, *vtg1*, *vtg2*, *esr1*, and *esr2*. Representative qPCR samples were run on 3% agarose gel and acquired using c600 Azure Imaging System (Azure Biosystems).

**Supplementary Table S1:** List of qPCR primers used in this study

| Gene (NCBI geneID/ NM)                       | Primer Sequence (5'-3')                                                                     | Gene (NCBI geneID/ NM)                        | Primer Sequence (5'-3')                                                             |
|----------------------------------------------|---------------------------------------------------------------------------------------------|-----------------------------------------------|-------------------------------------------------------------------------------------|
| <i>b-actin</i><br>(ID: 57934 / NM_131031.1)  | <i>b-actin</i> -Fw: GTGCTAGACTCTGGTGATGGTGTG<br><i>b-actin</i> -Rv: GGTGATGACCTGACCTGACCGTC | <i>fshb</i><br>(ID: 402919 / NM_205624.1)     | <i>fshb</i> -Fw: GGACTATGCTGGACAATGGATC<br><i>fshb</i> -Rv: ACAGCTCAGAGCCACGGG      |
| <i>sod1</i><br>(ID: 30553 / NM_131294.1)     | <i>sod1</i> -Fw: GGCCAACCGATAGTGTGAGA<br><i>sod1</i> -Rv: GAGTCAGCATTCATCCTCG               | <i>lhb</i><br>(ID: 402917 / NM_205622.2)      | <i>lhb</i> -Fw: TGTATTGGCTGGAATGGTGTG<br><i>lhb</i> -Rv: CCGGCTCTTGTAACGGGAT        |
| <i>sod2</i><br>(ID: 335799 / NM_199976.1)    | <i>sod2</i> -Fw: TCATCACAGCAAGCACCATG<br><i>sod2</i> -Rv: GGTGTGCATCACCTTGG                 | <i>esr1</i><br>(ID: 259252 / NM_152959.1)     | <i>esr1</i> -Fw: CTGGAAGTGTGATGATTGGC<br><i>esr1</i> -Rv: ATGCACCAGAATTGATGAGTATG   |
| <i>cat</i><br>(ID: 30068 / NM_130912.2)      | <i>cat</i> -Fw: CGATGACAACGTGACCCAAG<br><i>cat</i> -Rv: TTCAGATGCCCGGCATATT                 | <i>esr2a</i><br>(ID: 317734 / NM_180966.2)    | <i>esr2</i> -Fw: CGACTCCGCAAGTGCTATGA<br><i>esr2</i> -Rv: CGCCTCTAGAATACAGCTAACCA   |
| <i>ogg1</i><br>(ID: 158858 / NM_001123308.2) | <i>ogg1</i> -Fw: CTTACAGGAGTGGCTTTGC<br><i>ogg1</i> -Rv: AGTCCTTCGACCATGCCCTG               | <i>vtg1</i><br>(ID: 559475 / NM_001044897.3)  | <i>vtg1</i> -Fw: TCATGCTGATCCTGAAACCAT<br><i>vtg1</i> -Rv: GGTGACCAGCATTTGCCCA      |
| <i>casp3a</i><br>(ID: 140621 / NM_131877.3)  | <i>casp3a</i> -Fw: AGGCTTGTGAGGAACAGAA<br><i>casp3a</i> -Rv: CTGGGATCCTTACACGACCA           | <i>vtg2</i><br>(ID: 559931 / NM_001044913.1)  | <i>vtg2</i> -Fw: GACATTCTCAAGGGCACTACAAG<br><i>vtg2</i> -Rv: GAGCAGGAGCTTTCACAGGAGT |
| <i>casp3b</i><br>(ID: 566604 / NM_131889.4)  | <i>casp3b</i> -Fw: TCTGGCATTTGAGTGTGACGG<br><i>casp3b</i> -Rv: TATCTGGTGCGGTGGAGTA          | <i>gnhr3</i><br>(ID: 564687 / NM_001177450.1) | <i>gnhr3</i> -Fw: CGGCAGTTTCACGCGAGC<br><i>gnhr3</i> -Rv: GGACAGCACAAATGATGAGGG     |
